# Supplementary figures and images for: Assessing the Significance of Conserved Genomic Aberrations Using High Resolution Genomic Microarrays
Source: PLOS journal article supplement (doi:10.1371/journal.pgen.0030143), 2007-08-20

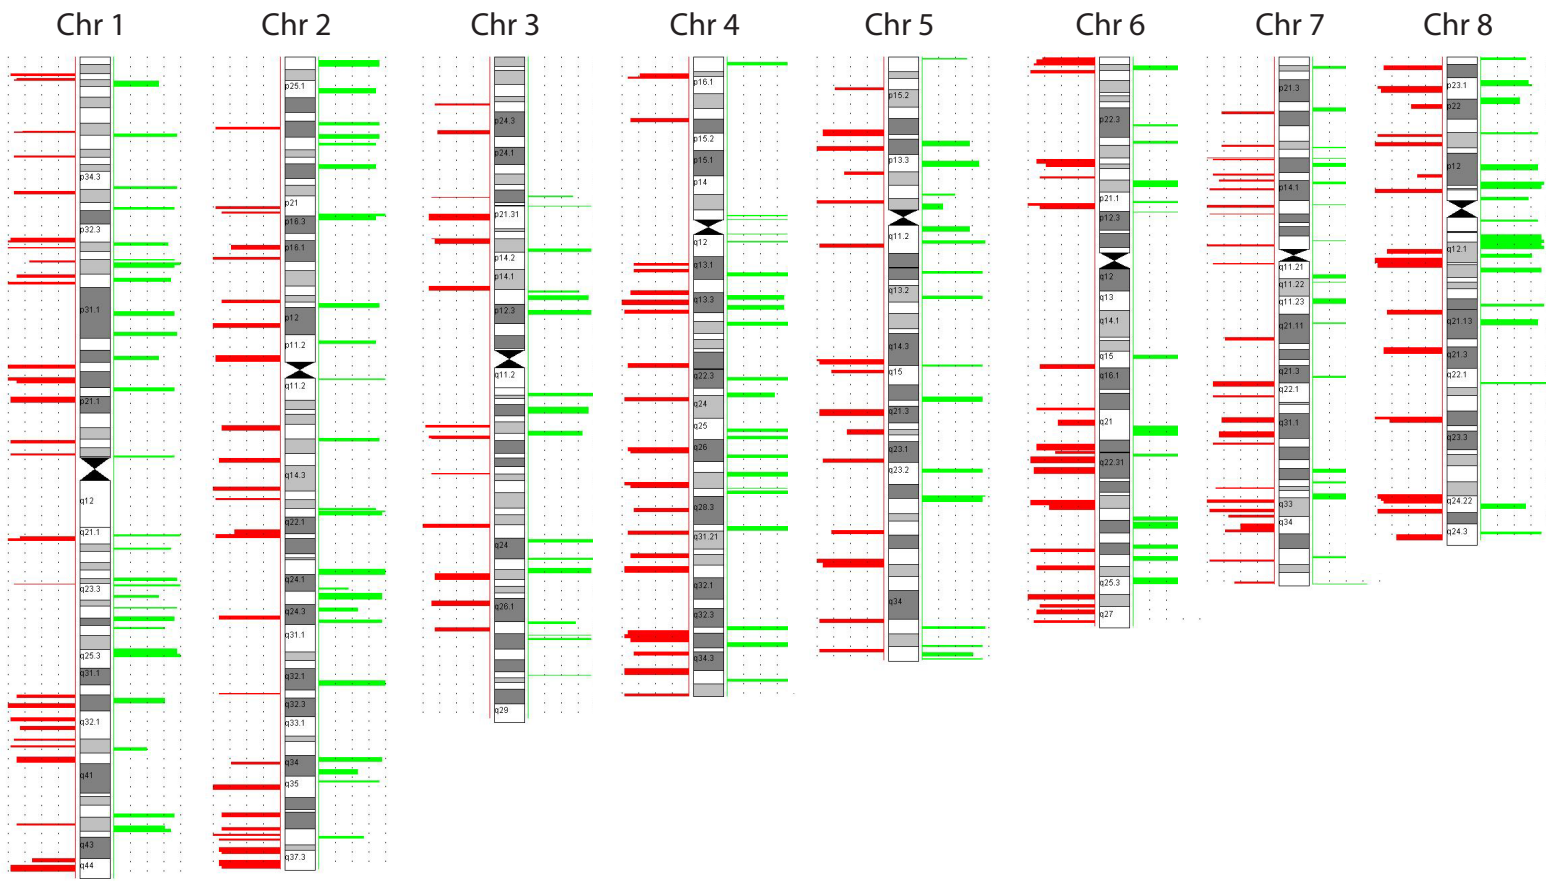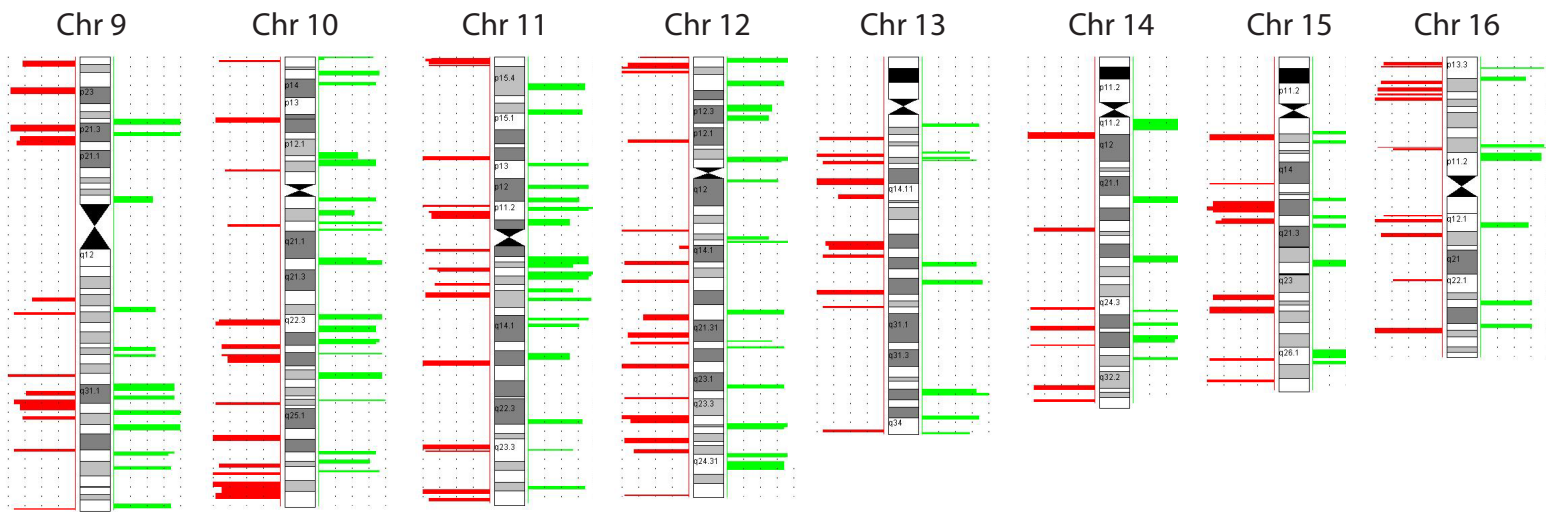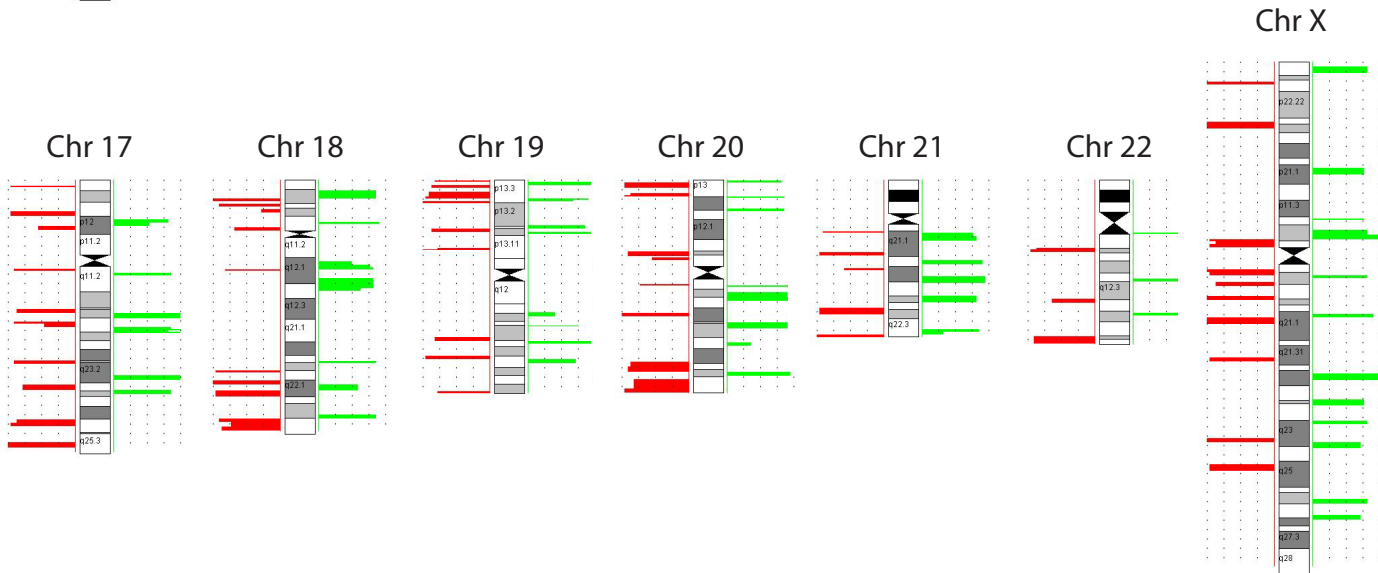

Supplement: S4 (10.1371/journal.pgen.0030143.s004) [file journal.pgen.0030143.sg004.PDF]
